# Supplementary material
Source: PubMed Central journal article supplement (PMC2171153)
Supplement: JCI0832752sd.pdf [file JCI0832752sd.pdf]

**Inhibition of apolipoprotein B100 secretion by lipid-induced hepatic endoplasmic reticulum stress.**

**Tsuguhito Ota, Constance Gayet, Henry N. Ginsberg**

Supplemental Figure S1

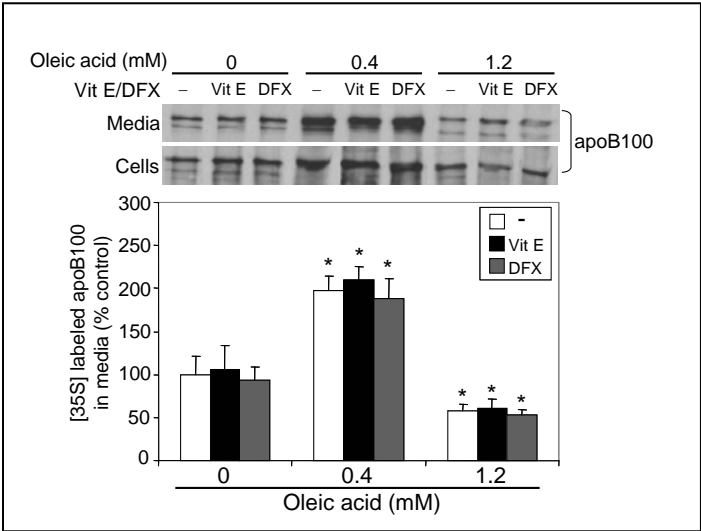

Supplemental Figure S2

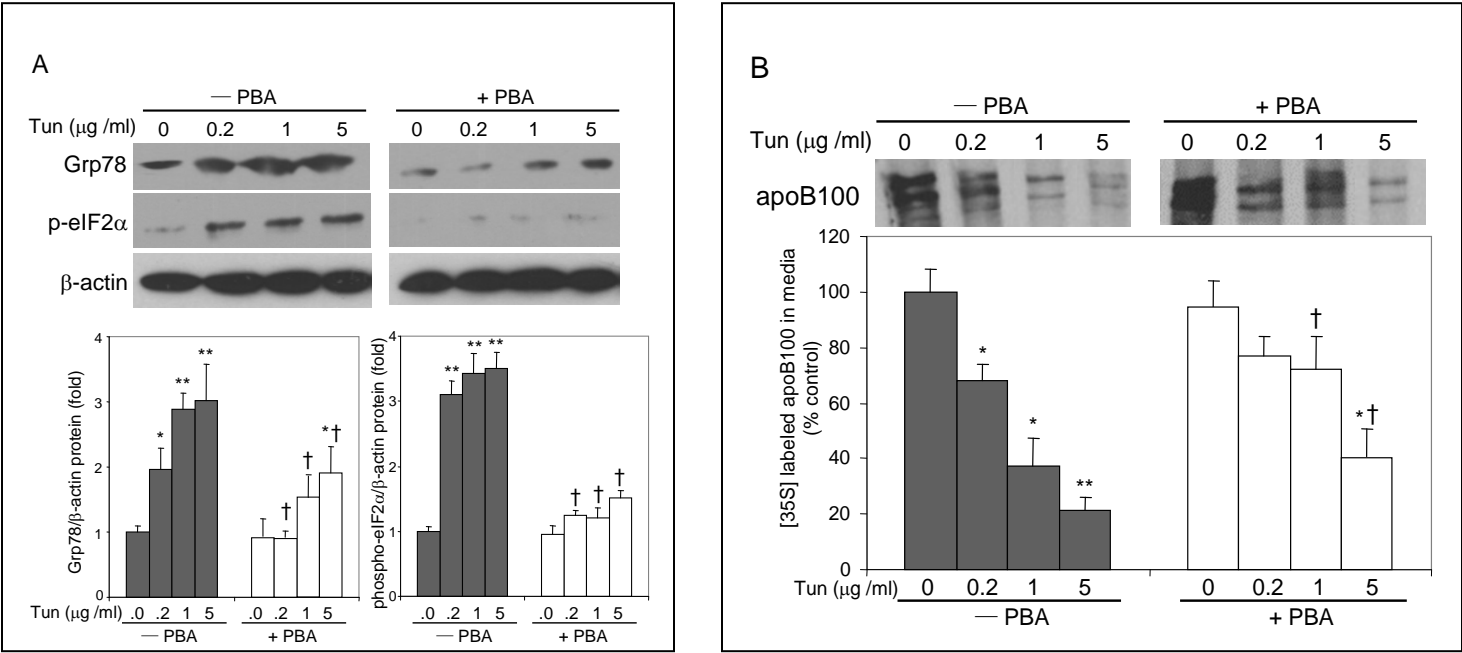

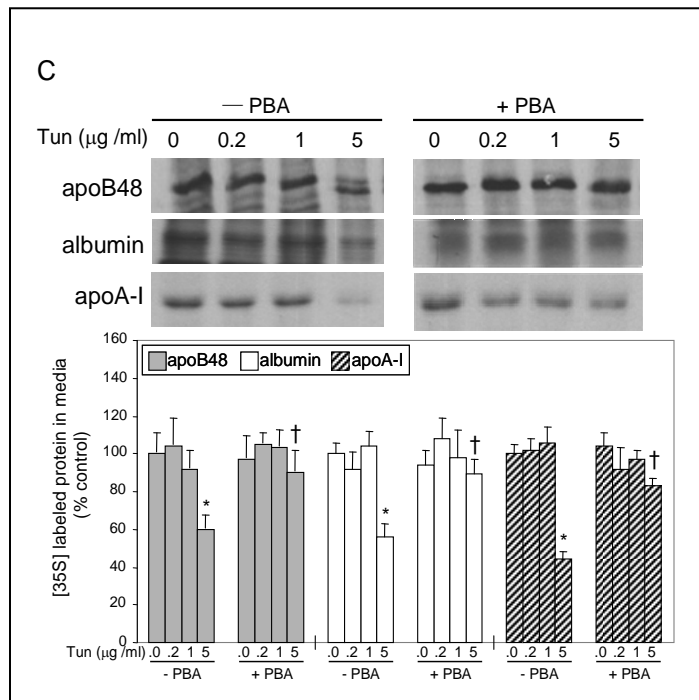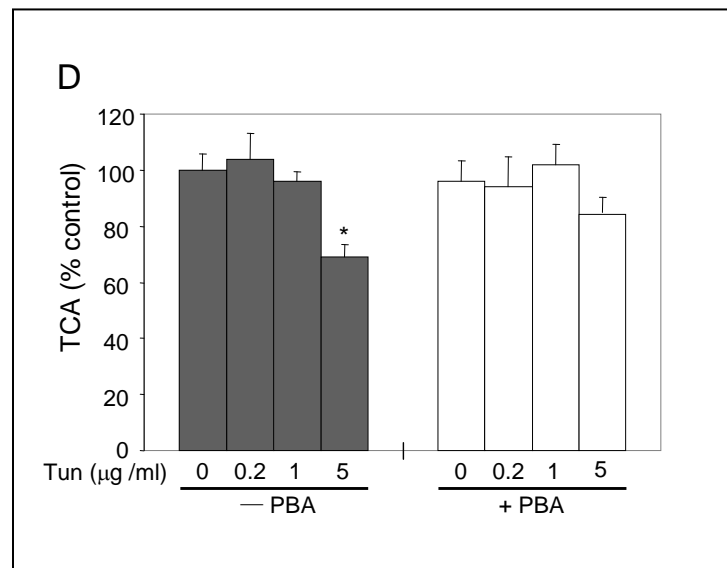

Supplemental Figure S3

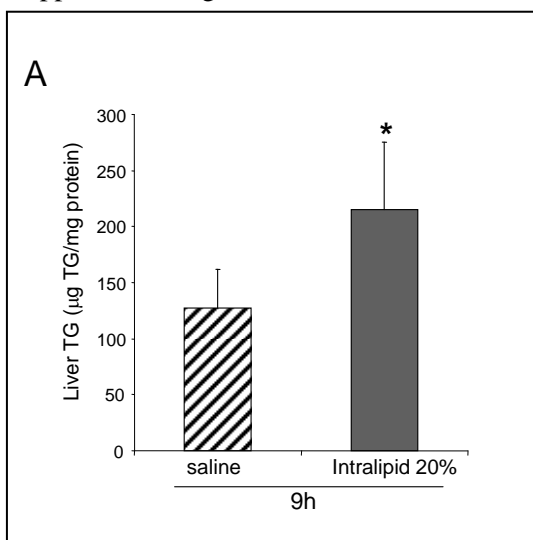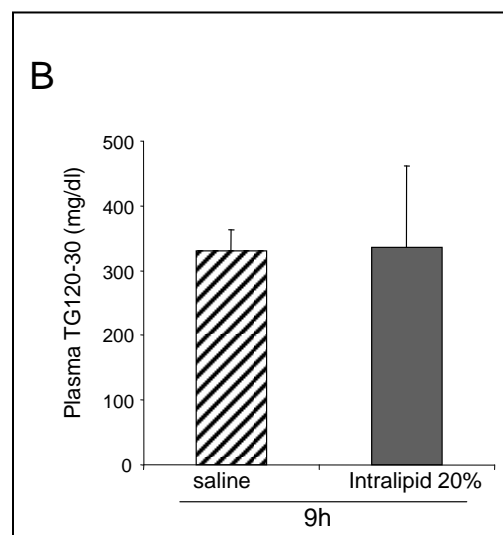

C

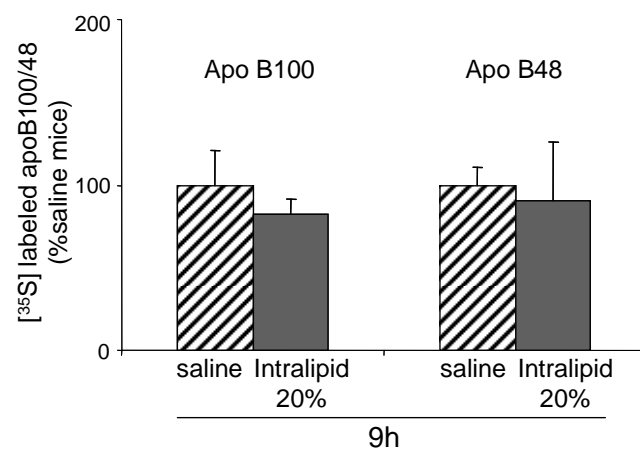

**Supplemental Figure S1. Neither vitamin E nor desferrioxamine prevents ER stress-associated inhibition of apoB100 secretion.** To determine if lipid peroxidation was involved in the non-proteasomal degradation of apoB associated with ER stress, McA cells were treated with OA for 16 hrs, in the presence or absence of either vitamin E (Vit E, 120  $\mu$ M) or desferrioxamine (DFX, 100  $\mu$ M) (32). The cells were then incubated in methionine/cysteine-free DMEM for 2 hrs and then [<sup>35</sup>S]-methionine for 2 hrs. Both of these additional incubations were under the same conditions as the previous 16 hrs. Neither vitamin E nor DFX altered the parabolic effect of increasing concentrations of OA on apoB100 secretion. The data shown are representative of three experiments.

**Supplemental Figure S2. Tunicamycin elicits ER stress in a dose dependent manner and this is associated with inhibition of apoB100 secretion that is reversible with PBA.** McA cells were incubated with/without PBA (1 mM) for 16 hrs and then with/without PBA plus 0–5  $\mu$ g/ml tunicamycin (Tun) for an additional 6 hrs. **(A)** Incubations with tunicamycin increased Grp78 protein levels and the levels of phosphorylated eIF2 $\alpha$ , as analyzed by immunoblot; activation of these markers of ER stress was significantly blocked by PBA. **(B)** McA cells were incubated with/without PBA (1 mM) for 16 hrs and then with/without PBA plus 0–5  $\mu$ g/ml tunicamycin for an additional 6 hrs followed by methionine/cysteine-free DMEM for 2 hrs, and then [<sup>35</sup>S]-methionine for 2 hrs. Tunicamycin decreased apoB100 secretion in a dose dependent manner (left side); PBA treatment restored the secretion of apoB100 at all doses of tunicamycin except 5  $\mu$ g/ml, where the effect of PBA was only partial (right side). **(C)** Under these same conditions, tunicamycin did not affect apoB48, albumin or apoA-I secretion except at highest concentration (5  $\mu$ g/ml) (left side); PBA treatment restored the secretion of these proteins at the 5  $\mu$ g/ml dose of tunicamycin (right side). **(D)** TCA precipitable radioactivity was unaffected except at highest concentration (5  $\mu$ g/ml) of tunicamycin. However, trypan blue staining was unaffected by all doses of tunicamycin for 6 hrs (data not shown). All data are mean  $\pm$  SD; n=3 per group.

\* $P < 0.05$ , \*\* $P < 0.01$  vs incubations in the absence of tunicamycin; † $P < 0.05$  vs incubations with the same concentration of tunicamycin but without PBA.

**Supplemental Figure S3. Intravenous infusion of 20% Intralipid for 9 hrs results in steatosis and loss of Intralipid-stimulated apoB and TG secretion.** C57BL/6J mice were infused intravenously with saline or Intralipid 20% for 9 hrs (n=4 and n=7, respectively). **(A)** At the end of the 9-hr infusions, mice infused with Intralipid and saline were sacrificed and the livers were collected for the measurement of liver TG content. The mean values of liver TG content are expressed as  $\mu\text{g}$  of TG/ mg of liver total protein. Infusion of Intralipid for 9 hrs significantly increased liver TG levels compared with the saline. Data are mean  $\pm$  SD, \* $p < 0.05$  versus saline. **(B)** At the end of 9-hr Intralipid infusions, Triton WR1339 was injected intravenously. Blood samples were collected every 30 minutes between the end of the infusion (time 0) and during 2 hours (time 120) to measure plasma TG concentration. The *bar graph* represents the absolute increase in plasma TG levels between 30 and 120 min after Triton injection. 9-hr infusions of Intralipid did not stimulate TG secretion compared to saline. **(C)** [ $^{35}\text{S}$ ]-methionine was injected in the mice at the end of the 9-hr Intralipid infusions to measure the secretion of newly synthesized apoB100 and apoB48. Infusion of Intralipid for 9 hrs did not stimulate either apoB100 or apoB48 secretion compared with saline.
